# Supplementary material for: Elemental imaging by laser-induced breakdown spectroscopy for the geological characterization of minerals
Source: Royal Society of Chemistry journal article supplement (doi:10.1039/c8ja00048d), 2018-01-01

### Supplementary Material

**Supplementary Figure 1:** Example of LIBS images performed with the 10Hz system allowing the detection of sulfur (180.731 nm) and oxygen (777.194 nm). Same emission lines has been used for other elements (c.f. supplementary table 1).

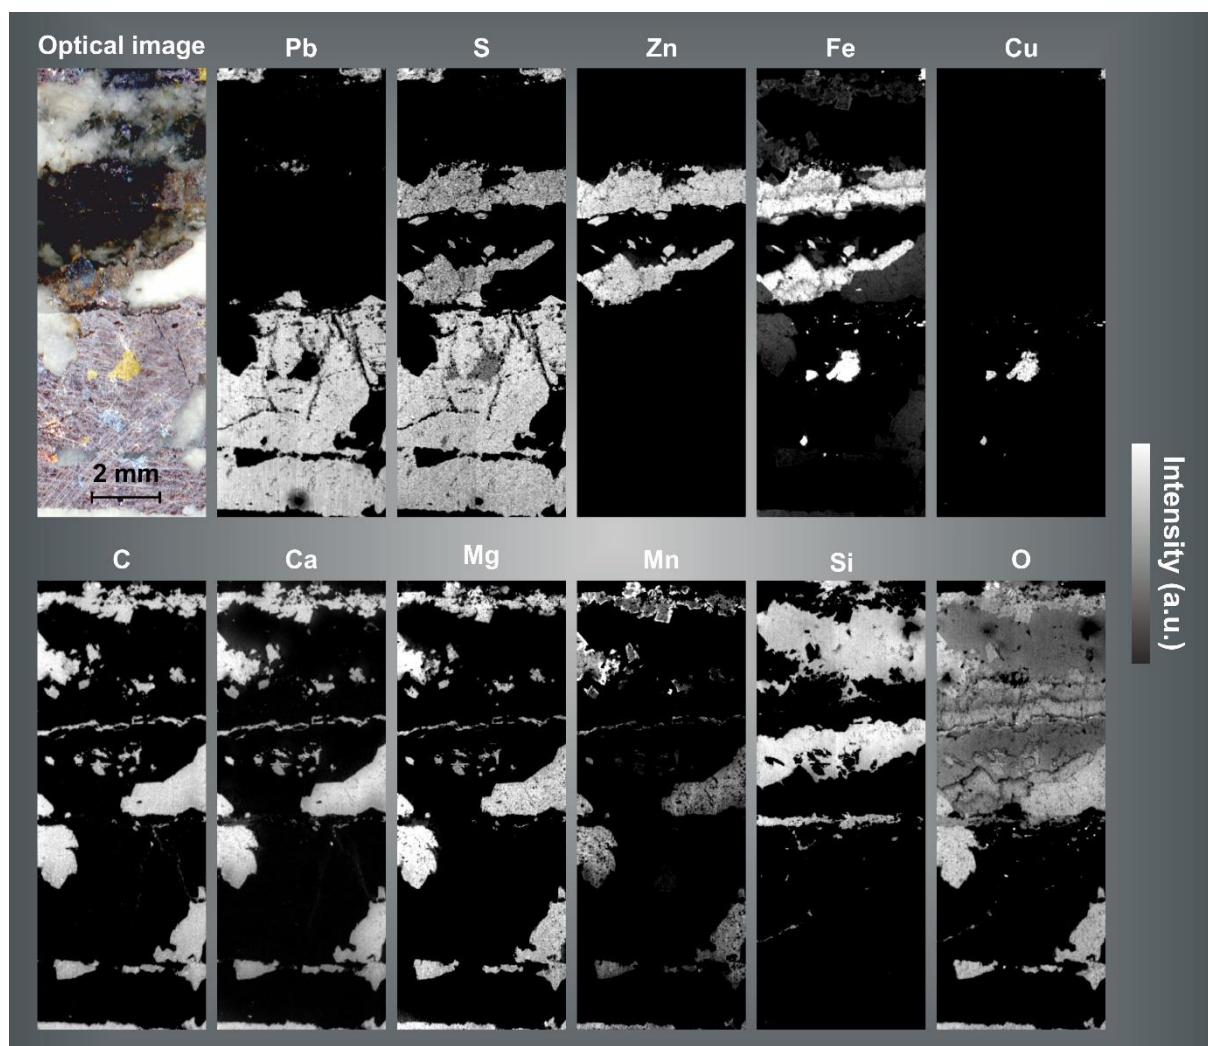

**Supplementary Table 1:** Detected lines.

| Phase        | Element | Position (nm) |
|--------------|---------|---------------|
| Carbonates   | C I     | 193.0905      |
|              | Mn II   | 259.3724      |
|              | Mg I    | 285.2126      |
|              | Fe I    | 302.0639      |
|              | Mo I    | 313.2594      |
|              | Ca II   | 315.8869      |
|              | Y II    | 332.7878      |
|              | La II   | 333.7486      |
| Chalcopyrite | Fe II   | 259.9396      |
|              | Sn I    | 317.5035      |
|              | Cu I    | 327.3960      |
| Galena       | Pb I    | 283.3053      |
|              | Fe I    | 302.0639      |
|              | Sb I    | 302.9834      |
|              | Bi I    | 306.7707      |
|              | Cu I    | 324.7537      |
|              | Ag I    | 328.0679      |
| Quartz       | Mg I    | 285.2126      |
|              | Si I    | 288.1578      |
|              | Fe I    | 302.0639      |
|              | Al I    | 308.2153      |
|              | Be II   | 313.042       |
|              | Ca II   | 315.8869      |
| Sphalerite   | Zn II   | 202.5483      |
|              | Cd II   | 226.5019      |
|              | Fe I    | 302.0639      |
|              | Cu I    | 324.7537      |
| Others       | Ni I    | 313.4101      |
|              | As I    | 286.0438      |
|              | Zr II   | 267.8646      |
|              | Ti II   | 334.9408      |
|              | P I     | 213.6182      |

**Supplementary Figure 3:** Estimation of the plasma parameters by comparing experimental and simulated spectra. The chosen experimental spectrum corresponds to a single shot acquisition performed on the sphalerite phase, containing low concentration of iron. Note that the electron density has been determined from the H $\alpha$  line (results not shown). The plasma temperature was then obtained by a manual adjustment of the Fe simulation spectrum. This adjustment was conducted with the idea to obtain a good intensity levels from atomic and ionic lines of iron. The resolution power (RP) as well as the background noise ( $\sigma$ ) are also indicated. Note that a background value of 190 has been added to the simulated spectrum.

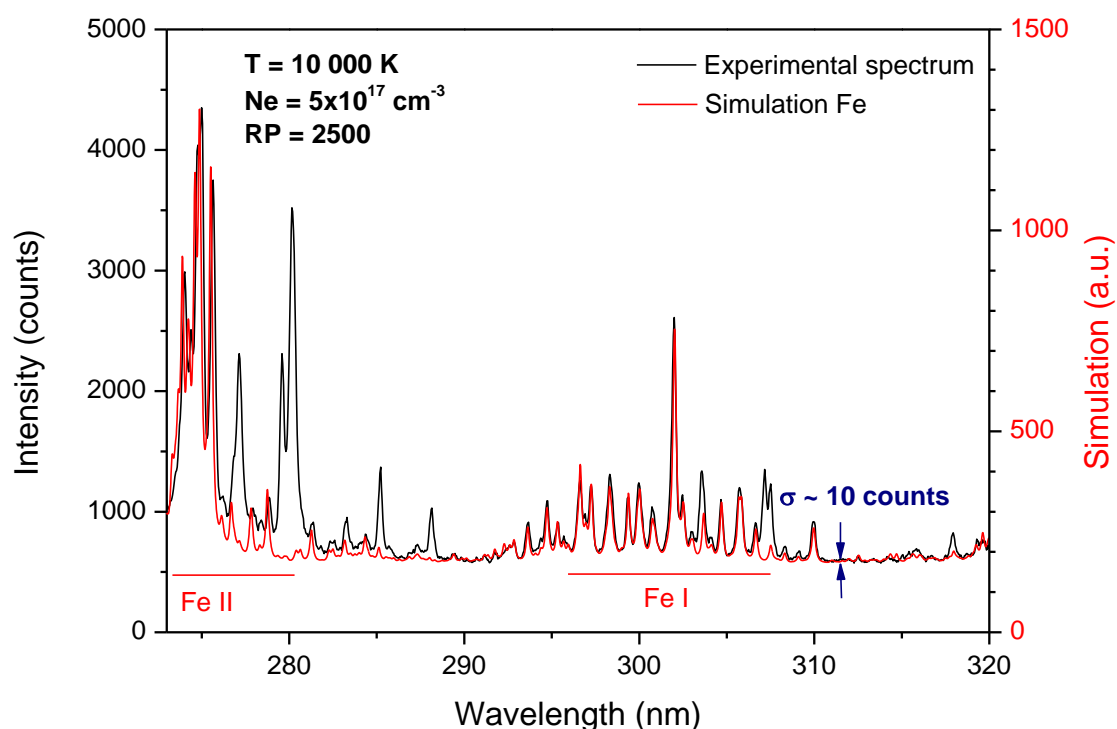

Supplement: c8ja00048d1.pdf [file c8ja00048d1.pdf]
